# Supplementary material for: Multi-omics Analysis of Redox Imbalance-Related Mild Health Problems in Monkeys
Source: Research Square preprint supplement (doi:10.21203/rs.3.rs-453434/v1), 2021-04-23
Supplement: Supplementary file 6 [file f0878fe8dc1fdbac527ca3cd.xlsx]

## Sheet: Feces-Hydrophilic
Observed MW	368.343	474.289	298.25	590.458	576.442	494.342	492.327	506.343	480.327	382.308	198.198	286.214	482.342	478.311	466.31	467.315	214.193	348.233	464.296	482.433	510.337	284.002	468.417	510.464	466.402	348.197	166.048	92.0292	358.021	150.017	428.08	631.485	298.054	617.469	454.402	603.454	240.067	222.056	148.037	296.075	414.028	308.202	452.386	432.04	462.122	524.48	120.042	394.381	564.512
RT min	1.213	1.219	1.22	1.222	1.223	1.229	1.23	1.232	1.233	1.233	1.234	1.236	1.236	1.237	1.238	1.239	1.24	1.241	1.242	1.242	1.245	1.247	1.248	1.251	1.252	1.252	1.254	1.254	1.254	1.255	1.255	1.256	1.257	1.257	1.258	1.258	1.259	1.259	1.259	1.259	1.259	1.259	1.261	1.262	1.265	1.265	1.266	1.267	1.267
Monkey 1	3608.17	139546	253299	33027.7	57352.4	1.42333e+06	400072	48681.2	823404	5949.1	602341	1.34171e+06	46471.8	64516.3	1.08315e+07	2.65159e+06	143110	8797.2	323968	31972.8	416295	24665.1	57542.2	43623.6	16399.6	24483.9	1.22317e+06	318995	91392.9	308862	230779	2.45201e+06	630921	1.39539e+06	54935	234202	1.39422e+06	759687	153781	139248	54486.4	21020.1	16994.7	9178.3	16785.7	80147.5	1.34709e+06	121448	939738
Monkey 2	15801.9	169421	1.83792e+06	28261.9	22693.3	1.26295e+06	393075	20795	1.08805e+06	11412	5738.34	6647.13	83396	167810	1.60775e+07	3.93277e+06	7034.42	8244.94	626721	105724	446068	33307.2	327167	18464.8	89462.4	9211.03	1.83574e+06	519082	106588	507393	322586	1.27573e+06	851978	786278	1.03959e+06	119385	2.21123e+06	1.0158e+06	207845	190152	62912.3	7838.23	269324	9109.52	29515.7	15142.7	1.91421e+06	1.22341e+06	330749
Monkey 3	10294.9	217652	1.83742e+06	17049.1	16971.1	729119	242289	16263.5	624353	8331.6	8345.96	8548.95	18534.2	103899	1.24387e+07	3.02993e+06	8643.1	10128.7	536804	76404.2	264289	87452	388790	9205.15	80772.8	10786.1	4.55451e+06	1.33334e+06	265864	1.19622e+06	748912	736393	2.00299e+06	445915	1.06846e+06	102039	4.81207e+06	2.07126e+06	453677	384815	115104	9804.35	227570	10056.9	61521.5	11363.2	4.69778e+06	1.96742e+06	249276
Monkey 4	10005.4	269892	2.74703e+06	26538.4	63445	1.52171e+06	443885	24824.1	911976	7185.22	192174	710514	113822	113189	1.45387e+07	3.47601e+06	54192.8	314142	119869	99539.7	475043	32485.9	397000	36549.6	102117	21996	1.07856e+06	312017	96480.1	248863	207799	3.11078e+06	774577	2.42702e+06	746690	457892	1.40887e+06	852317	185218	165410	90484.5	10023.2	152525	9737.44	26220.4	40150.7	1.20342e+06	1.13758e+06	548499
Monkey 5	4632.46	198946	2.18459e+06	13821.9	18016.8	1.68638e+06	405190	11784.5	877591	5228.32	692037	2.37437e+06	146510	100287	8.06038e+06	1.80856e+06	247812	59872.7	63160.6	101363	424766	21131.3	449178	28037.2	123728	8675.35	1.09126e+06	290659	67388.1	286483	207812	859435	535639	729293	1.0184e+06	168595	1.15783e+06	639215	145244	126926	58407.3	130741	265355	8555.23	20951.6	21408.5	1.23037e+06	1.00504e+06	378120
Monkey 6	13807.1	228114	2.69608e+06	13050.3	13096.7	2.11323e+06	587056	39690.4	1.5665e+06	7262.56	330928	813371	80466.7	241889	2.29147e+07	5.68945e+06	150514	378536	507054	105744	631213	22675.2	445156	21464.8	104427	10410.4	1.06138e+06	293293	86138.2	273335	201949	986338	656859	706147	1.42569e+06	157087	1.39586e+06	686399	162123	167571	76563.1	12029	378610	10111.3	18077.8	13516.6	1.16051e+06	1.79167e+06	261391
Monkey 7	16339.8	216516	1.97072e+06	28293.9	46852.3	971829	355343	32520.1	809522	8014.46	7256.15	21426.2	44867.9	172915	1.79162e+07	4.52867e+06	8193.82	1.09878e+06	439765	66758.1	401726	38606.3	294926	8991.52	152243	9936.85	1.84917e+06	562275	114866	499966	344227	1.00401e+06	919653	831518	565792	227390	2.14474e+06	1.06881e+06	214280	195380	75235.3	10062.4	244434	9673.56	28442.8	11289.3	1.95271e+06	723467	405025
Monkey 8	16040.5	167055	2.27052e+06	7801.42	16893.2	1.99454e+06	621749	31142.9	1.43202e+06	7577.01	440147	1.35973e+06	74715.4	249829	2.37092e+07	6.01983e+06	196948	289054	413599	104328	682220	27638.9	619863	8711.17	200517	16238.5	1.32871e+06	363344	101024	323576	259097	1.06501e+06	659995	1.03931e+06	1.37336e+06	294402	1.7247e+06	775448	155912	136420	51676.3	151965	466725	8506.63	19744.9	14260.3	1.39348e+06	2.08153e+06	377119
Monkey 9	13740.7	193444	2.49831e+06	100708	188132	1.74839e+06	542068	33782.2	1.13155e+06	6655.1	334130	784616	133619	176923	2.12574e+07	5.12851e+06	109317	49891.8	357586	123129	572941	18981.9	508465	33203.4	130527	39398.9	877798	238324	66626.1	223233	173118	2.67512e+06	465029	2.03067e+06	993416	448107	1.16189e+06	579350	111661	114846	41492.2	94799.7	337701	9223.79	16298	20794.1	956094	1.00383e+06	364750
Monkey 10	10425.8	152254	1.96506e+06	122067	131128	2.14776e+06	621326	32616.5	1.58191e+06	7107.25	486309	1.49607e+06	113011	270729	1.60627e+07	4.02169e+06	227084	438032	335344	103166	660626	21251.2	318884	32796.8	56373.1	9690.25	830284	234335	63812.5	215513	155871	974440	527383	642621	1.07453e+06	137778	1.13652e+06	557310	111802	103498	59737.8	8165.7	232182	9086.61	15549.3	38211.7	886809	1.24222e+06	246771
Monkey 11	6900.08	181828	1.83532e+06	8161.17	5941.46	1.10068e+06	303435	10582.5	800343	6620.12	114143	413736	57886.4	113366	9.01064e+06	2.19058e+06	99007.9	199313	192254	64632.5	339665	47893.6	337673	8695.13	63536.1	10080.3	2.7897e+06	824679	142026	699981	427025	568113	1.13134e+06	461183	1.04646e+06	108467	2.81403e+06	1.2843e+06	251232	249445	97254.7	8641.88	219451	9504.34	32598.2	10143	2.92851e+06	1.81342e+06	284994
Monkey 12	6753.83	336150	3.03808e+06	13204.2	17588	1.65822e+06	468363	14474.2	1.12316e+06	6508.21	423103	1.41875e+06	119291	186494	1.28259e+07	3.15423e+06	245792	185229	182803	48905.7	500683	29314.1	181649	33098.4	17527.8	8119.82	1.37564e+06	411036	124651	379048	287885	902333	946631	789553	566764	230859	1.73122e+06	928533	195317	178010	115469	7034.33	98766.3	9300.6	24485.9	11382.1	1.50834e+06	703074	547894
Monkey 13	20322.4	148581	1.81947e+06	47190.1	60691.9	4.62666e+06	1.28653e+06	35744.6	2.91765e+06	17071.4	7100.01	7435.08	367211	396418	2.41929e+07	5.87338e+06	8272.63	491773	628362	26627.9	1.35403e+06	22166	15574.6	108847	8089.11	80617.2	1.23791e+06	318533	79962.1	314751	225440	6.79271e+06	586660	3.49244e+06	26503.3	471959	1.48716e+06	760067	143132	136611	67279.6	7835.14	9584.12	8525.4	18650.8	120596	1.33146e+06	43994.6	79538.7
Monkey 14	1330.59	142948	2.2475e+06	3.77016e+06	5.82252e+06	1.16636e+06	311415	39307.1	688221	7401.84	671977	2.39028e+06	118072	78835.9	6.73663e+06	1.66297e+06	71599.6	150561	48396.9	72375.9	325733	27615.1	158292	62400.7	27696.9	187306	1.07714e+06	315003	97226.2	273200	274520	2.21606e+06	660449	5.30878e+06	295068	1.46217e+06	1.16307e+06	833791	150898	141370	81749.5	8039.42	43606.3	8701.37	19802.4	69659.8	1.21342e+06	306522	121984
Monkey 15	21434.6	194241	2.86323e+06	169100	268428	2.68326e+06	862807	31881.9	1.75118e+06	8384.37	204509	534592	287296	282892	2.53271e+07	6.30869e+06	63891.9	85260	649176	91569.7	915230	25355.6	226820	42610.5	80738	26792.8	953149	240906	86962.2	234716	208197	2.82001e+06	635073	2.10336e+06	447574	409130	1.19797e+06	712373	147744	166724	83486.7	9784.49	91600.5	10534.3	19192	80181.3	1.05224e+06	562829	106155
Monkey 16	24009.7	189756	2.19675e+06	48093.2	79467.4	2.59945e+06	762563	38703.7	1.77913e+06	7707.3	231995	783661	126173	301418	2.83872e+07	6.69735e+06	55042	1.17812e+06	479992	136274	823443	20014.2	203214	38754.7	33356.4	13129	792960	219376	65573	199474	163337	2.88134e+06	443795	2.26441e+06	331509	725094	991479	568728	117772	111624	46381.3	9290.45	83504.8	9949.97	15989.2	50412.2	913908	359103	393045
Monkey 17	3970.51	251267	2.94277e+06	635809	868877	1.45377e+06	446915	13068.7	1.0637e+06	6625.62	713389	2.41142e+06	108459	159184	1.11758e+07	2.82763e+06	496638	320049	290563	91523.8	476083	40954.2	328367	38675.9	95859.2	24628.4	1.95197e+06	546879	132978	496055	368885	1.58105e+06	932927	1.29912e+06	938955	269881	2.37447e+06	1.17523e+06	258135	243541	76353.8	11401.1	230615	8760.2	35045.3	11345.6	2.01429e+06	825162	509238
Monkey 18	22444.7	176876	2.00677e+06	21963	27106.9	2.92479e+06	778365	38499.5	2.29031e+06	20857.4	7981.9	24094.9	87377	340261	2.79434e+07	6.69537e+06	14891.7	1.22948e+06	626774	65004.7	833164	28474.4	109245	80131.5	8785.81	10496.9	1.69201e+06	386869	101075	371005	269083	2.59075e+06	674239	1.18689e+06	196967	236561	1.65339e+06	874872	169313	172184	53003	8304.82	63486.6	8802.03	22925.3	76719.4	1.76534e+06	216685	177832
Monkey 19	83517.5	173000	2.42066e+06	16814.3	49889.8	4.04849e+06	1.39221e+06	48989.6	3.82018e+06	14708.5	327939	1.03765e+06	136830	731737	7.12589e+07	1.72288e+07	88024.6	530278	2.02908e+06	208343	1.52777e+06	43179.3	958359	75864.4	223946	17326.8	1.90406e+06	483896	113786	458885	390677	3.05826e+06	848562	2.31772e+06	1.34854e+06	522027	2.06783e+06	1.15445e+06	261862	232487	68799.6	40953.3	338816	14608.9	25108.9	19659.8	1.98788e+06	1.86473e+06	107973
Monkey 20	11547.9	259861	1.51508e+06	7766.27	6148.63	1.06492e+06	278434	15501.9	918501	16735.2	7739.46	8538.76	29802	160632	1.00706e+07	2.32471e+06	8789.34	20414	200479	39267.4	314065	63221.6	186997	9033.97	27717.3	10751	3.96442e+06	1.18046e+06	194875	901513	530700	251622	1.66654e+06	248653	831895	65450.1	4.0268e+06	1.63431e+06	351565	344982	129511	80406.9	174832	9500.61	52272.8	12482.8	4.13561e+06	1.44721e+06	290247
Correlation with Stool Water	-0.146535	0.531362	0.221292	-0.442221	-0.448223	-0.428718	-0.404321	-0.708009	-0.324305	-0.0790028	-0.249684	-0.183717	-0.389929	-0.195708	-0.217302	-0.212574	0.159783	-0.0415998	-0.156194	-0.0344764	-0.384785	0.394324	0.228629	-0.679556	0.309245	-0.606865	0.451478	0.477467	0.399642	0.474473	0.403565	-0.682678	0.461213	-0.775256	0.531558	-0.673143	0.486086	0.404301	0.430625	0.437779	0.367319	0.281963	0.525996	-0.0976887	0.493897	-0.763779	0.447794	0.50436	-0.00270165
ｔ	-0.62848	2.66115	0.96273	-2.09184	-2.12731	-2.01331	-1.87553	-4.25349	-1.45452	-0.336231	-1.09397	-0.792942	-1.79653	-0.846693	-0.944505	-0.922972	0.686725	-0.176646	-0.670912	-0.146358	-1.76868	1.82049	0.996379	-3.92996	1.37964	-3.23942	2.14669	2.30549	1.84967	2.28682	1.87133	-3.96371	2.20532	-5.20723	2.66252	-3.86188	2.35984	1.87542	2.0243	2.06582	1.67553	1.24686	2.62392	-0.41645	2.40986	-5.02022	2.12476	2.47809	-0.0114622
p	0.537583	0.0159093	0.348439	0.0508972	0.0474749	0.0592831	0.0770367	0.000477943	0.163018	0.740584	0.288392	0.438139	0.089212	0.408283	0.357418	0.368229	0.501008	0.861759	0.510795	0.885266	0.09389	0.085353	0.332273	0.000981639	0.184596	0.00455019	0.0456945	0.0332564	0.0808501	0.0345362	0.0776439	0.000910545	0.0406747	5.94155e-05	0.0158634	0.00114246	0.0297768	0.0770523	0.0580392	0.0535485	0.111114	0.228431	0.0172106	0.682005	0.0268768	8.88685e-05	0.0477133	0.0233459	0.990981
[truncated: 3,076 more columns]
